# Supplementary material
Source: Royal Society of Chemistry journal article supplement (doi:10.1039/d6tc00096g)
Supplement: d6tc00096g1.pdf [file d6tc00096g1.pdf]

Supplementary Materials for  
Magnetic structure of layered  $\text{Co}_2\text{B}_2\text{O}_5$  and the role of the bridging  $\text{B}_2\text{O}_5$  anions in  
three-dimensional magnetic ordering

V.S. Zhandun<sup>a\*</sup>, Yu.S. Gokhfeld<sup>a</sup>, N.V. Kazak<sup>a</sup>, A.D. Vasiliev<sup>a</sup>, G.M. Zeer<sup>b</sup>, S.M. Zharkov<sup>a,b</sup>,  
A.S. Tarasova<sup>a</sup>, N.G. Zamkova<sup>a</sup>, S.N. Vereshchagin<sup>c</sup>, E.V. Eremin<sup>a</sup>, V.V. Sokolov<sup>a</sup>, S.G.  
Ovchinnikov<sup>a</sup>

<sup>a</sup>Kirensky Institute of Physics, Federal Research Center KSC SB RAS, 660036 Krasnoyarsk, Russian Federation

<sup>b</sup>Siberian Federal University, 660041, Russian Federation

<sup>c</sup>Institute of Chemistry and Chemical Technology, Federal Research Center KSC SB RAS, 660036, Russian Federation

\**e-mail*: [jvc@iph.krasn.ru](mailto:jvc@iph.krasn.ru)

|                                     |                |
|-------------------------------------|----------------|
| <b>SM1. Structural information</b>  | <b>Page S2</b> |
| <b>SM2. Sample characterization</b> | <b>Page S3</b> |
| <b>SM3. DFT+U calculations</b>      | <b>Page S4</b> |

## SM1. Structural information

**Table S1** Fractional atomic coordinates and equivalent isotropic displacement parameters ( $\text{\AA}^2$ ) for  $\text{Co}_2\text{B}_2\text{O}_5$ .

| Atom | Wyck. | $x$         | $y$        | $z$        | $U_{\text{iso}}^*/U_{\text{eq}} (\text{\AA}^2)$ |
|------|-------|-------------|------------|------------|-------------------------------------------------|
| Co1  | 2i    | 0.73014(13) | 0.21238(8) | 0.35890(5) | 0.0081(2)                                       |
| Co2  | 2i    | 0.23455(13) | 0.37164(8) | 0.10170(5) | 0.0074(2)                                       |
| B1   | 2i    | 0.6984(11)  | 0.6811(7)  | 0.3555(4)  | 0.0075(7)                                       |
| B2   | 2i    | 0.3331(11)  | 0.8810(6)  | 0.1692(4)  | 0.0072(7)                                       |
| O1   | 2i    | 0.2608(8)   | 0.6962(5)  | 0.0542(3)  | 0.0092(5)                                       |
| O2   | 2i    | 0.2175(8)   | 0.0929(5)  | 0.1811(3)  | 0.0099(5)                                       |
| O3   | 2i    | 0.7386(8)   | 0.4765(4)  | 0.2580(3)  | 0.0086(5)                                       |
| O4   | 2i    | 0.5594(8)   | 0.8604(4)  | 0.2986(3)  | 0.0101(5)                                       |
| O5   | 2i    | 0.7713(8)   | 0.7247(5)  | 0.5030(3)  | 0.0104(5)                                       |

**Table S2** Anisotropic atomic displacement parameters ( $\text{\AA}^2$ ) of  $\text{Co}_2\text{B}_2\text{O}_5$ .

| Atom | $U_{11}$   | $U_{22}$   | $U_{33}$   | $U_{23}$   | $U_{13}$    | $U_{12}$     |
|------|------------|------------|------------|------------|-------------|--------------|
| Co1  | 0.0080(3)  | 0.0094(3)  | 0.0072(3)  | 0.0026(2)  | 0.00013(19) | -0.00059(19) |
| Co2  | 0.0075(3)  | 0.0085(3)  | 0.0065(3)  | 0.0027(2)  | 0.00046(18) | -0.00019(18) |
| B1   | 0.0055(15) | 0.0094(17) | 0.0077(17) | 0.0024(13) | 0.0004(12)  | 0.0016(12)   |
| B2   | 0.0075(14) | 0.0091(18) | 0.0053(16) | 0.0024(14) | 0.0021(12)  | -0.0007(12)  |
| O1   | 0.0088(11) | 0.0102(12) | 0.0082(12) | 0.0014(10) | -0.0009(9)  | -0.0007(9)   |
| O2   | 0.0127(12) | 0.0075(12) | 0.0097(12) | 0.0023(9)  | 0.0007(9)   | 0.0021(9)    |
| O3   | 0.0107(12) | 0.0079(12) | 0.0068(11) | 0.0011(9)  | 0.0013(9)   | -0.0001(9)   |
| O4   | 0.0132(11) | 0.0085(12) | 0.0077(11) | 0.0003(9)  | -0.0029(9)  | 0.0010(9)    |
| O5   | 0.0092(11) | 0.0155(13) | 0.0063(12) | 0.0018(9)  | 0.0009(9)   | 0.0012(9)    |

**Table S3.** Bond valence (v.u.) analysis for  $\text{Co}_2\text{B}_2\text{O}_5$  [1]. The calculations were carried out for cobalt and boron ions with  $R_{\text{Co}} = 1.692$ ,  $R_{\text{B}} = 1.371$ , and parameter  $R = 0.37$ . The  $C.N.$  denotes coordination number.

|          | Co1   | Co2   | B1    | B2    | $\Sigma$ | $\Sigma/C.N.$ |
|----------|-------|-------|-------|-------|----------|---------------|
| O1       |       | 0.294 |       | 1.038 | 1.991    | 0.498         |
|          |       | 0.300 |       |       |          |               |
|          |       | 0.359 |       |       |          |               |
| O2       | 0.216 | 0.416 |       | 1.076 | 1.917    | 0.479         |
|          | 0.209 |       |       |       |          |               |
| O3       | 0.375 | 0.287 | 1.031 |       | 2.019    | 0.505         |
|          |       | 0.326 |       |       |          |               |
| O4       | 0.300 |       | 0.890 | 0.880 | 2.070    | 0.690         |
| O5       | 0.461 |       | 1.101 |       | 1.954    | 0.651         |
|          | 0.392 |       |       |       |          |               |
| $\Sigma$ | 1.953 | 1.982 | 3.022 | 2.994 |          |               |

## SM2. Sample characterization

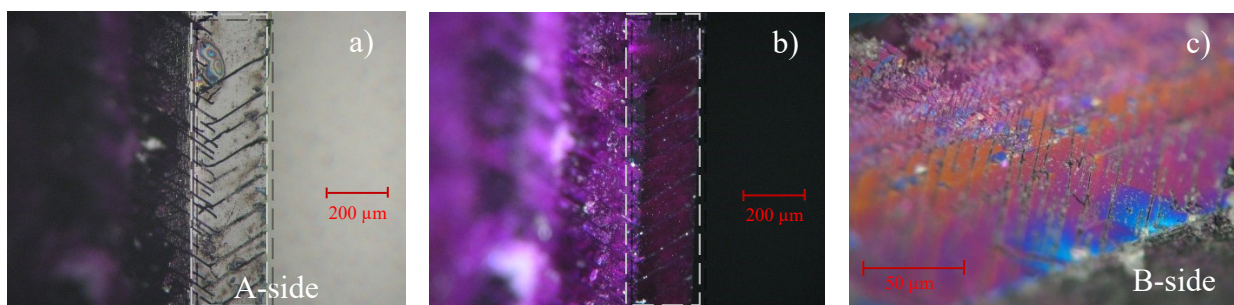

Fig. S1 Micrographs of the  $\text{Co}_2\text{B}_2\text{O}_5$  single crystal in a brightfield (a) and darkfield polarized (b,c) reflected light. The A-side has a mirror surface.

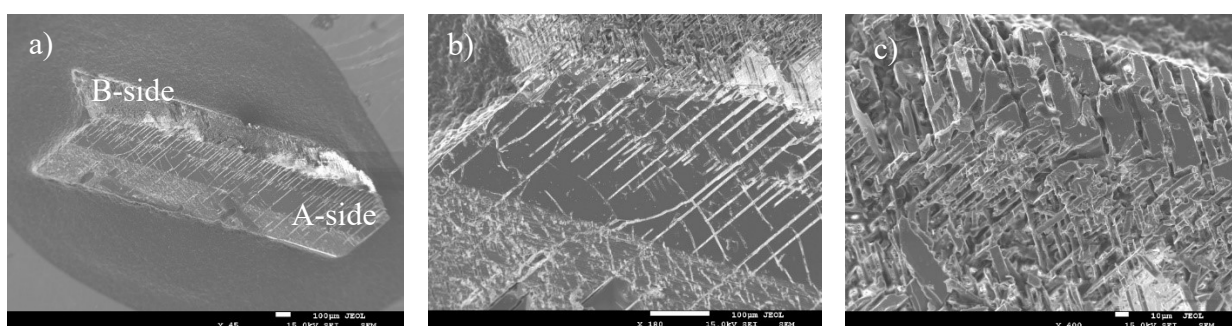

Fig. S2. (a) SEM images of  $\text{Co}_2\text{B}_2\text{O}_5$  single crystal. Magnified views of the surfaces of A-side (b) and B-side (c).

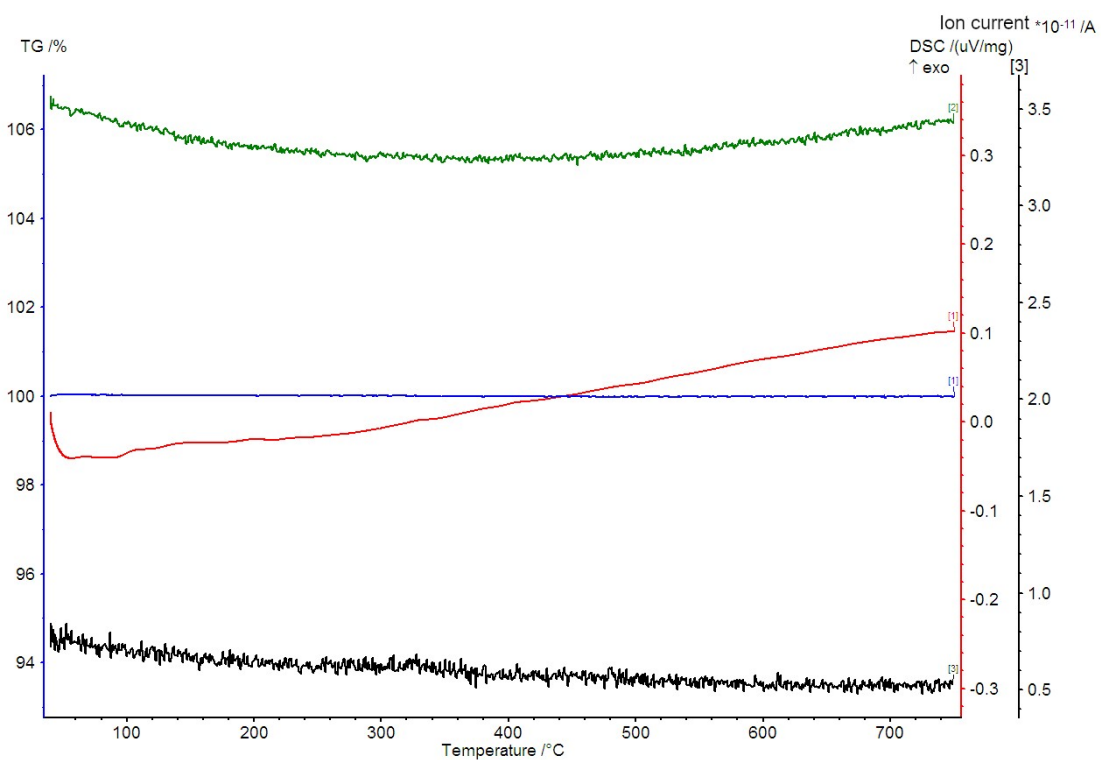

Fig. S3 TG (blue), DSC (red) and intensity of ion current (olive,  $m/z=18$ ; black  $m/z=44$ ) curves for the crashed single crystal  $\text{Co}_2\text{B}_2\text{O}_5$ .

### SM3. DFT+U calculations

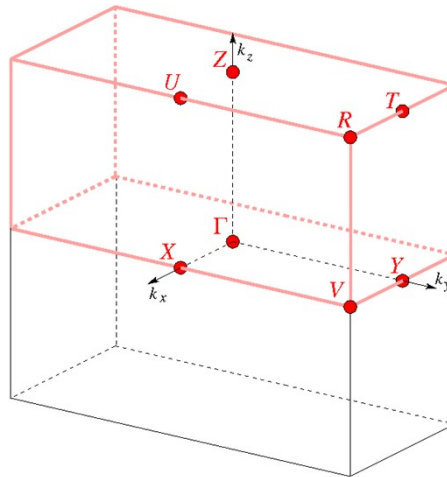

Fig. S4. Brillouin zone of  $\text{Co}_2\text{B}_2\text{O}_5$  with the high symmetry  $\mathbf{k}$ -points marked as used in calculations (retrieved from Bilbao Crystallographic server [2]).

Table S4. Variation of band gap, magnetic moments, and lattice parameters of  $\text{Co}_2\text{B}_2\text{O}_5$  with Hubbard parameter  $U$ .

| U<br>(eV) | Band gap<br>(eV) | Moment per<br>atom ( $\mu_B$ ) |      | Lattice parameters |         |         |                 |                |                 |
|-----------|------------------|--------------------------------|------|--------------------|---------|---------|-----------------|----------------|-----------------|
|           |                  | Co1                            | Co2  | $a$ (Å)            | $b$ (Å) | $c$ (Å) | $\alpha$ (grad) | $\beta$ (grad) | $\gamma$ (grad) |
| 0         | 0.23             | 2.58                           | 2.59 | 3.1875             | 6.2104  | 9.3264  | 104.28          | 90.85          | 91.95           |
| 1         | 1.22             | 2.65                           | 2.66 | 3.1890             | 6.2137  | 9.3292  | 104.28          | 90.85          | 91.96           |
| 2         | 2.13             | 2.69                           | 2.70 | 3.1900             | 6.2155  | 9.3316  | 104.29          | 90.84          | 91.96           |
| 2.5       | 2.62             | 2.71                           | 2.72 | 3.1905             | 6.2168  | 9.3334  | 104.29          | 90.84          | 91.96           |
| 3         | 3.14             | 2.73                           | 2.74 | 3.1910             | 6.2179  | 9.3351  | 104.29          | 90.84          | 91.97           |
| 3.5       | 3.55             | 2.75                           | 2.76 | 3.1914             | 6.2187  | 9.3365  | 104.29          | 90.84          | 91.97           |
| 4         | 4.17             | 2.77                           | 2.78 | 3.1916             | 6.2193  | 9.3373  | 104.30          | 90.83          | 91.97           |
| 5         | 4.78             | 2.80                           | 2.81 | 3.1920             | 6.2207  | 9.3393  | 104.30          | 90.83          | 91.98           |
| 6         | 5.11             | 2.82                           | 2.83 | 3.1921             | 6.2217  | 9.3401  | 104.31          | 90.82          | 91.99           |

The effect of the Hubbard parameter  $U$  on the band gap, magnetic moments, and lattice parameters is summarized in Table S4. With increasing  $U$ , the band gap increases and at  $U = 4$  eV approaches the value close to the experimental optical band gap of 4.20 eV. The magnetic moments on Co atoms are noticeably changed up to  $U = 4$  eV, followed by the small change. The  $a$ ,  $b$ , and  $c$  lattice parameters increase significantly up to  $U = 4$  eV, after which the increase is not steep. For  $U = 4$  eV the lattice parameters approach the values close to our experimental and reported in Ref. [3].

**Table S5.** Maximal magnetic space groups for the parent space group  $P\bar{1}$  and the propagation vectors  $\mathbf{k} = (0, 0, 0)$ ,  $(\frac{1}{2}, 0, 0)$ , and  $(0, \frac{1}{2}, \frac{1}{2})$ . The type of ordering permitted in the sublattice (ferro- or antiferromagnetic) determine the net magnetic moment. The MAXMAGN program [4] on the Bilbao Crystallographic Server was used to prepare this table.

| Group (BNS)                                                    | Magnetic moment   |                             |                 |                             |                 |
|----------------------------------------------------------------|-------------------|-----------------------------|-----------------|-----------------------------|-----------------|
|                                                                | Per atom          |                             | Net             | Per atom                    |                 |
|                                                                | 2i position (Co1) |                             |                 | 2i position (Co2)           |                 |
| <b><math>\mathbf{k} = (0, 0, 0)</math></b>                     |                   |                             |                 |                             |                 |
| <a href="#">P-1' (#2.6)</a>                                    | $mGM_1^-$         | $\pm M_x, \pm M_y, \pm M_z$ | 0, 0, 0         | $\pm M_x, \pm M_y, \pm M_z$ | 0, 0, 0         |
| <a href="#">P-1 (#2.4)</a>                                     | $mGM_1^+$         | $M_x, M_y, M_z$             | $M_x, M_y, M_z$ | $M_x, M_y, M_z$             | $M_x, M_y, M_z$ |
| <b><math>\mathbf{k} = (\frac{1}{2}, 0, 0)</math></b>           |                   |                             |                 |                             |                 |
| <a href="#">P<sub>5</sub>-1 (#2.4.7)</a>                       | $mX_1^-$          | $\pm M_x, \pm M_y, \pm M_z$ | 0, 0, 0         | $\pm M_x, \pm M_y, \pm M_z$ | 0, 0, 0         |
| <a href="#">P<sub>5</sub>-1 (#2.4.7)</a>                       | $mX_1^+$          | $M_x, M_y, M_z$             | 0, 0, 0         | $M_x, M_y, M_z$             | 0, 0, 0         |
| <b><math>\mathbf{k} = (0, \frac{1}{2}, \frac{1}{2})</math></b> |                   |                             |                 |                             |                 |
| <a href="#">P<sub>5</sub>-1 (#2.4.7)</a>                       | $mT_1^-$          | $\pm M_x, \pm M_y, \pm M_z$ | 0, 0, 0         | $\pm M_x, \pm M_y, \pm M_z$ | 0, 0, 0         |
| <a href="#">P<sub>5</sub>-1 (#2.4.7)</a>                       | $mT_1^+$          | $M_x, M_y, M_z$             | 0, 0, 0         | $M_x, M_y, M_z$             | 0, 0, 0         |

**Table S6.** The selective collinear (C) magnetic orderings constructed in accordance with basis vectors of the irreducible representations (IRs). The reference energies  $\Delta E$  (meV/f.u.) are given relative to the energy of the ground magnetic ordering (C-AFM<sub>T#1</sub>). The A and B ribbons consist of the rows Co1-Co2-Co2'-Co1' (see text, Fig. 3). The rows are ferromagnetically coupled along [100] direction for  $\mathbf{k} = (0, 0, 0)$  and  $(0, \frac{1}{2}, \frac{1}{2})$  and antiferromagnetic for  $\mathbf{k} = (\frac{1}{2}, 0, 0)$ . The cobalt magnetic moments are directed along [101] for all propagation vectors. The arrows indicate the mutual direction of the magnetic moments within each row. The  $M$  is total magnetic moment per formula unit ( $\mu_B$ ).

| IRs                                                            | Magnetic ordering     | $\Delta E$ | A<br>(Co1-Co2-Co2'-Co1')                        | B<br>(Co1-Co2-Co2'-Co1')                            | $M$  |
|----------------------------------------------------------------|-----------------------|------------|-------------------------------------------------|-----------------------------------------------------|------|
| <b><math>\mathbf{k} = (0, 0, 0)</math></b>                     |                       |            |                                                 |                                                     |      |
| $mGM_1^-$                                                      | C-AFM <sub>GM#1</sub> | 4.12       | $\uparrow - \uparrow - \downarrow - \downarrow$ | $\uparrow - \uparrow - \downarrow - \downarrow$     | 0    |
| $mGM_1^-$                                                      | C-AFM <sub>GM#2</sub> | 7.98       | $\uparrow - \downarrow - \uparrow - \downarrow$ | $\uparrow - \downarrow - \uparrow - \downarrow$     | 0    |
| $mGM_1^+(\text{Co1}) \oplus$<br>$mGM_1^-(\text{Co2})$          | C-AFM <sub>GM#3</sub> | 18.65      | $\uparrow - \downarrow - \uparrow - \uparrow$   | $\uparrow - \downarrow - \uparrow - \uparrow$       | 3.45 |
| $mGM_1^-(\text{Co1}) \oplus$<br>$mGM_1^+(\text{Co2})$          | C-AFM <sub>GM#4</sub> | 35.90      | $\uparrow - \uparrow - \downarrow - \uparrow$   | $\uparrow - \uparrow - \downarrow - \uparrow$       | 3.53 |
| $mGM_1^+$                                                      | C-FM <sub>GM#5</sub>  | 37.50      | $\uparrow - \uparrow - \uparrow - \uparrow$     | $\uparrow - \uparrow - \uparrow - \uparrow$         | 6.9  |
| <b><math>\mathbf{k} = (0, \frac{1}{2}, \frac{1}{2})</math></b> |                       |            |                                                 |                                                     |      |
| $mT_1^-$                                                       | C-AFM <sub>T#1</sub>  | 0          | $\uparrow - \uparrow - \uparrow - \uparrow$     | $\downarrow - \downarrow - \downarrow - \downarrow$ | 0    |
| $mT_1^-$                                                       | C-AFM <sub>T#2</sub>  | 12.57      | $\uparrow - \downarrow - \downarrow - \uparrow$ | $\downarrow - \uparrow - \uparrow - \downarrow$     | 0    |
| $mT_1^+$                                                       | C-AFM <sub>T#3</sub>  | 27.76      | $\uparrow - \uparrow - \downarrow - \downarrow$ | $\downarrow - \downarrow - \uparrow - \uparrow$     | 0    |
| <b><math>\mathbf{k} = (\frac{1}{2}, 0, 0)</math></b>           |                       |            |                                                 |                                                     |      |
| $mX_1^-$                                                       | C-AFM <sub>X#1</sub>  | 29.53      | $\uparrow - \uparrow - \uparrow - \uparrow$     | $\downarrow - \downarrow - \downarrow - \downarrow$ | 0    |
| $mX_1^+$                                                       | C-AFM <sub>X#2</sub>  | 39.84      | $\uparrow - \uparrow - \downarrow - \downarrow$ | $\uparrow - \uparrow - \downarrow - \downarrow$     | 0    |

**Table S7.** The selective non-collinear (NC) magnetic orderings constructed in accordance with basis vectors of the irreducible representations (IRs). The reference energies  $\Delta E$  (meV/f.u.) are given relative to the energy of the ground magnetic ordering (C-AFM<sub>T#1</sub>). The A and B ribbons consist of the rows Co1-Co2-Co2'-Co1' (Fig. S6). The rows are ferromagnetically coupled along [100] direction. The directions of the cobalt magnetic moments are shown in the 2<sup>nd</sup> column for Co1 – Co1' and Co2 – Co2'. The arrows indicate the mutual direction of the magnetic moments within each row. The  $M$  is total magnetic moment per formula unit ( $\mu_B$ ).

| IRs                                          | Magnetic moments directions | Magnetic ordering      | $\Delta E$ | A<br>(Co1-Co2-Co2'-Co1') | B<br>(Co1-Co2-Co2'-Co1') | $M$  |
|----------------------------------------------|-----------------------------|------------------------|------------|--------------------------|--------------------------|------|
| $\mathbf{k} = (0, 0, 0)$                     |                             |                        |            |                          |                          |      |
| mGM <sub>1</sub> <sup>+</sup>                | [100] - [010]               | NC-FM <sub>GM#1</sub>  | 9.31       | ↑ - ↑ - → - →            | ↑ - ↑ - → - →            | 3.25 |
| mGM <sub>1</sub> <sup>+</sup>                | [010] - [001]               | NC-FM <sub>GM#2</sub>  | 9.35       | ↑ - ↑ - → - →            | ↑ - ↑ - → - →            | 3.15 |
| mGM <sub>1</sub> <sup>+</sup>                | [100] - [001]               | NC-FM <sub>GM#3</sub>  | 9.52       | ↑ - ↑ - → - →            | ↑ - ↑ - → - →            | 3.26 |
| mGM <sub>1</sub> <sup>+</sup>                | [010] - [001]               | NC-AFM <sub>GM#4</sub> | 35.9       | ↑ - ↑ - → - →            | ↓ - ↓ - ← - ←            | 0.12 |
| mGM <sub>1</sub> <sup>+</sup>                | [100] - [010]               | NC-AFM <sub>GM#5</sub> | 37.1       | ↑ - ↑ - → - →            | ↓ - ↓ - ← - ←            | 0.17 |
| mGM <sub>1</sub> <sup>+</sup>                | [100] - [001]               | NC-AFM <sub>GM#6</sub> | 39.1       | ↑ - ↑ - → - →            | ↓ - ↓ - ← - ←            | 0.21 |
| $\mathbf{k} = (0, \frac{1}{2}, \frac{1}{2})$ |                             |                        |            |                          |                          |      |
| mT <sub>1</sub> <sup>+</sup>                 | [100] - [010]               | NC-FM <sub>T#1</sub>   | 4.8        | ↑ - ↑ - ← - ←            | ↓ - ↓ - → - →            | 0.86 |
| mT <sub>1</sub> <sup>+</sup>                 | [010] - [001]               | NC-FM <sub>T#2</sub>   | 5.0        | ↑ - → - ← - ↓            | ↓ - ← - → - ↑            | 0.90 |
| mT <sub>1</sub> <sup>+</sup>                 | [100] - [001]               | NC-FM <sub>T#3</sub>   | 6.6        | ↑ - ↑ - ← - ←            | ↓ - ↓ - → - →            | 0.91 |
| mT <sub>1</sub> <sup>-</sup>                 | [010] - [001]               | NC-AFM <sub>T#4</sub>  | 48.3       | ↑ - ↑ - ← - ←            | ↓ - ↓ - → - →            | 0.37 |
| mT <sub>1</sub> <sup>-</sup>                 | [100] - [010]               | NC-AFM <sub>T#5</sub>  | 51.8       | ↑ - ↑ - ← - ←            | ↓ - ↓ - → - →            | 0.41 |
| mT <sub>1</sub> <sup>-</sup>                 | [100] - [001]               | NC-AFM <sub>T#6</sub>  | 56.2       | ↑ - ↑ - ← - ←            | ↓ - ↓ - → - →            | 0.45 |

**Table S8.** Atomic coordinates of the triclinic and monoclinic structures of Co<sub>2</sub>B<sub>2</sub>O<sub>5</sub> obtained from DFT+U calculations. All sites are of 2i and 4e Wyckoff positions for triclinic and monoclinic structures, respectively.

| Atoms | Triclinic, space group $P\bar{1}(2)$ , $Z = 4$ |        |        | Monoclinic, space group $P2_1/c(14)$ , $Z = 4$ |        |        |
|-------|------------------------------------------------|--------|--------|------------------------------------------------|--------|--------|
|       | $x$                                            | $y$    | $z$    | $x$                                            | $y$    | $z$    |
| Co1   | 0.1358                                         | 0.7873 | 0.6411 | 0.8979                                         | 0.7119 | 0.3134 |
| Co2   | 0.6358                                         | 0.7873 | 0.6411 | 0.1021                                         | 0.2881 | 0.6865 |
| Co3   | 0.3643                                         | 0.2128 | 0.3589 | 0.1021                                         | 0.2118 | 0.1866 |
| Co4   | 0.8643                                         | 0.2128 | 0.3589 | 0.8979                                         | 0.7881 | 0.8134 |
| Co5   | 0.3818                                         | 0.6276 | 0.8981 | 0.3581                                         | 0.7954 | 0.6067 |
| Co6   | 0.8818                                         | 0.6276 | 0.8981 | 0.6420                                         | 0.2049 | 0.3932 |
| Co7   | 0.1182                                         | 0.3725 | 0.1020 | 0.6419                                         | 0.2953 | 0.8933 |
| Co8   | 0.6182                                         | 0.3725 | 0.1020 | 0.3580                                         | 0.7048 | 0.1068 |
| B1    | 0.1510                                         | 0.3183 | 0.6451 | 0.7012                                         | 0.0726 | 0.5708 |
| B2    | 0.6510                                         | 0.3183 | 0.6451 | 0.2987                                         | 0.9273 | 0.4293 |

|     |        |          |        |         |        |        |
|-----|--------|----------|--------|---------|--------|--------|
| B3  | 0.3490 | 0.6817   | 0.3549 | 0.2988  | 0.5727 | 0.9292 |
| B4  | 0.8490 | 0.6817   | 0.3549 | 0.7012  | 0.4273 | 0.0707 |
| B5  | 0.3329 | 0.1110   | 0.8307 | 0.8192  | 0.7226 | 0.4544 |
| B6  | 0.8329 | 0.1110   | 0.8307 | 0.1808  | 0.2777 | 0.5458 |
| B7  | 0.1671 | 0.8800   | 0.1693 | 0.1808  | 0.2226 | 0.0456 |
| B8  | 0.6671 | 0.8800   | 0.1693 | 0.8191  | 0.7776 | 0.9542 |
| O1  | 0.3692 | 0.3035   | 0.9460 | 0.9455  | 0.7867 | 0.6516 |
| O2  | 0.8692 | 0.3035   | 0.9460 | 0.0547  | 0.2131 | 0.3485 |
| O3  | 0.1309 | 0.6964   | 0.0539 | 0.0545  | 0.2867 | 0.8484 |
| O4  | 0.6309 | 0.6964   | 0.0539 | 0.9453  | 0.7133 | 0.1515 |
| O5  | 0.3913 | 0.9077   | 0.8188 | 0.4972  | 0.3024 | 0.6379 |
| O6  | 0.8913 | 0.9077   | 0.8188 | 0.5028  | 0.6976 | 0.3621 |
| O7  | 0.1087 | 0.0923   | 0.1813 | 0.5028  | 0.8024 | 0.8621 |
| O8  | 0.6087 | 0.0923   | 0.1813 | 0.4971  | 0.1976 | 0.1379 |
| O9  | 0.1306 | 0.5238   | 0.7418 | 0.7414  | 0.2727 | 0.7616 |
| O10 | 0.6306 | 0.523835 | 0.7418 | 0.2587  | 0.7274 | 0.2385 |
| O11 | 0.3694 | 0.4762   | 0.2582 | 0.2586  | 0.7726 | 0.7384 |
| O12 | 0.8694 | 0.4762   | 0.2582 | 0.7413  | 0.2274 | 0.2615 |
| O13 | 0.2201 | 0.1405   | 0.7017 | 0.6449  | 0.2243 | 0.6589 |
| O14 | 0.7201 | 0.1405   | 0.7017 | 0.3553  | 0.7755 | 0.3411 |
| O15 | 0.2799 | 0.8594   | 0.2983 | 0.3552  | 0.7244 | 0.8411 |
| O16 | 0.7799 | 0.8594   | 0.2983 | 0.6449  | 0.2755 | 0.1590 |
| O17 | 0.1142 | 0.2761   | 0.4973 | 0.83034 | 0.8492 | 0.5604 |
| O18 | 0.6142 | 0.2761   | 0.4973 | 0.1694  | 0.1506 | 0.4392 |
| O19 | 0.3858 | 0.7239   | 0.5027 | 0.1696  | 0.3492 | 0.9396 |
| O20 | 0.8858 | 0.7239   | 0.5027 | 0.8306  | 0.6507 | 0.0607 |

1. N.E. Brese and M. O'Keeffe, Bond-valence parameters for solids, Acta Cryst.. B47, 192 197 (1991). <https://doi.org/10.1107/S0108768190011041>
2. Bilbao Crystallographic Server, <http://webbdcrista2.ehu.es>
3. T. Kawano, H. Morito, H. Yamane, Synthesis and characterization of manganese and cobalt pyroborates:  $M_2B_2O_5$  (M = Mn, Co), Solid State Sciences 12, 1419-1421 (2010) <https://doi.org/10.1016/j.solidstatesciences.2010.05.021>
4. J.M. Perez-Mato, S.V. Gallego, E.S. Tasci, L. Elcoro, G. de la Flor, M.I. Aroyo, Symmetry-based computational tools for magnetic crystallography. Annual Review of Materials Research, 45(1), 217-248 (2015). 10.1146/annurev-matsci-070214-021008
